# Supplementary material for: Thermal-stimulated spin disordering accelerates water electrolysis
Source: Royal Society of Chemistry journal article supplement (doi:10.1039/d4ee04597a), 2024-12-05
Supplement: d4ee04597a1.pdf [file d4ee04597a1.pdf]

## Thermal-stimulated spin disordering accelerates water electrolysis

Fakang Xie,<sup>†a</sup> Yu Du,<sup>†a</sup> Mengfei Lu,<sup>b</sup> Shicheng Yan,<sup>\*a,b</sup> and , Zhigang Zou<sup>a,b</sup>

<sup>a</sup>. Collaborative Innovation Center of Advanced Microstructures, National Laboratory of Solid State Microstructures, College of Engineering and Applied Sciences, Nanjing University, No. 22 Hankou Road, Nanjing, Jiangsu 210093, P. R. China. E-mail: yscfei@nju.edu.cn

<sup>b</sup>. Jiangsu Key Laboratory for Nano Technology, Nanjing University, No. 22 Hankou Road, Nanjing, Jiangsu 210093, P. R. China

<sup>†</sup>These authors contributed equally to this work.

## Table of Contents

Figures S1-S22

Table S1-S7

References 1-4

## Figures

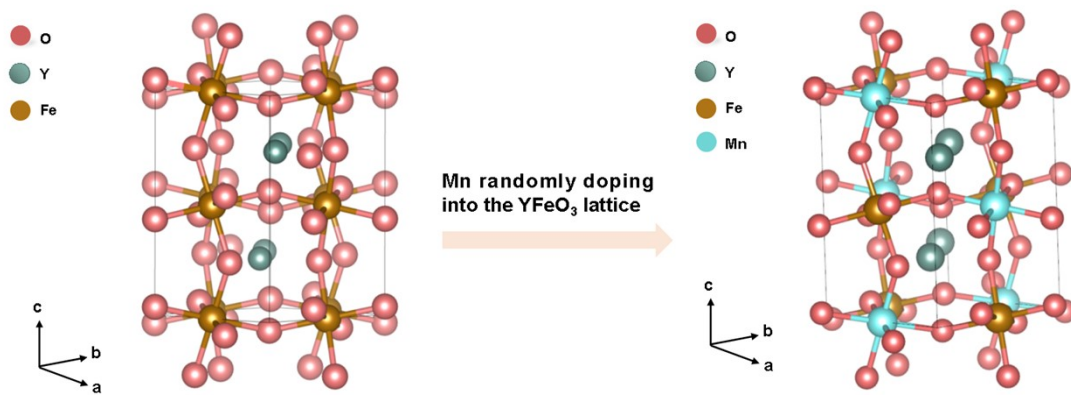

**Fig. S1** The crystal structures of  $\text{YFeO}_3$  and  $\text{YFe}_{1-x}\text{Mn}_x\text{O}_3$ .

In  $\text{YFeO}_3$  unit cell, crystallizing in an orthorhombically distorted perovskite structure with the space group  $\text{Pnma}^1$ , eight  $\text{FeO}_6$  octahedra units locate at the eight apexes of unit cell and they share the oxygen atom at their common apex of two adjacent octahedra<sup>2</sup>. The Y ions with large radius are located in eight octahedral voids. Mn doping is achieved by randomly replacing Fe in the lattice of  $\text{YFeO}_3$  to form a solid solution.

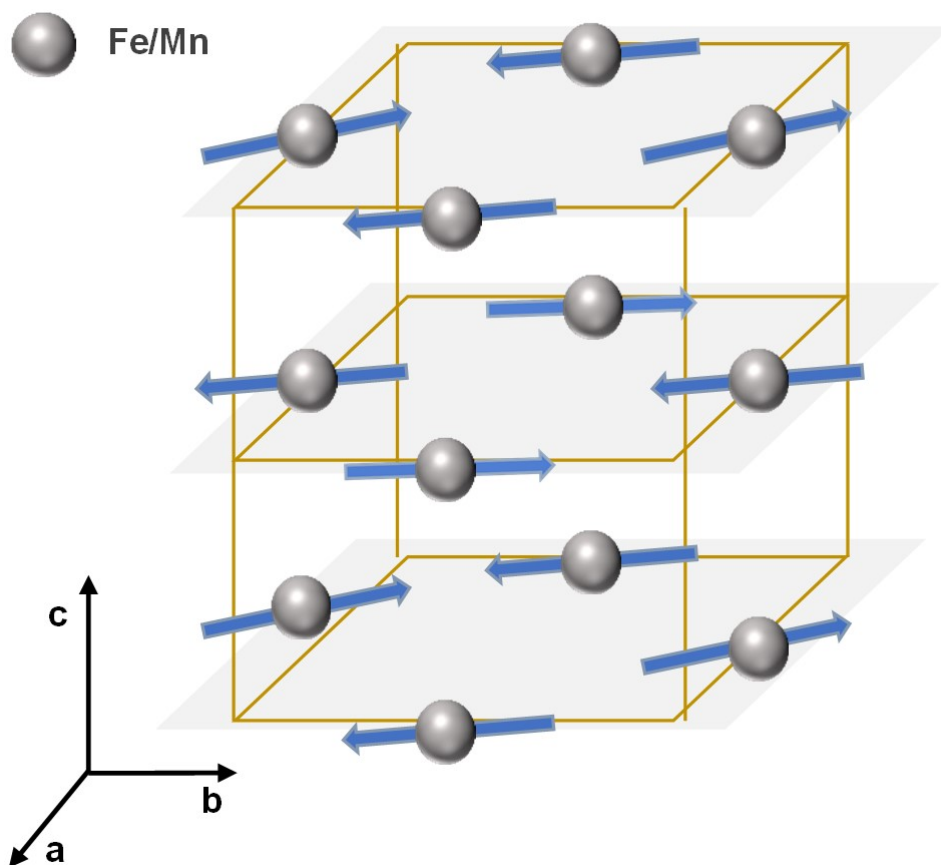

**Fig. S2** The spin structures of Fe<sup>3+</sup>/Mn<sup>3+</sup> spins at AFM state.

The magnetic structures of antiferromagnetism can generally be divided into the following types<sup>3</sup>:

- G-AFM (Geometric Antiferromagnetism): Refers to an antiferromagnetic structure where the atomic magnetic moments are arranged in a geometric pattern in space.
- C-AFM (Cubic Antiferromagnetism): Refers to an antiferromagnetic arrangement in a cubic crystal system, where the atomic magnetic moments are aligned in opposite directions on adjacent atoms.
- A-AFM (Body-Centered Antiferromagnetism): Refers to an antiferromagnetic arrangement in a body-centered cubic crystal system, where the atomic magnetic moments are aligned in opposite directions between the body center and the corners.
- E-AFM (Face-Centered Antiferromagnetism): Refers to an antiferromagnetic arrangement in a face-centered cubic crystal system, where the atomic magnetic moments are aligned in opposite directions between the face centers and the adjacent corners.
- S-AFM (Spiral Antiferromagnetism): Refers to a structure where atomic magnetic moments are arranged in a spiral pattern, forming a spin spiral structure.
- T-AFM (Triangular Antiferromagnetism): Refers to an antiferromagnetic arrangement in a triangular crystal system, where the atomic magnetic moments are aligned in opposite directions on adjacent atoms.

According to temperature-dependent magnetization data and neutron diffraction data, the magnetic ground state of YFe<sub>1-x</sub>Mn<sub>x</sub>O<sub>3</sub> belongs to G-AFM (Figure S2)<sup>1</sup>.

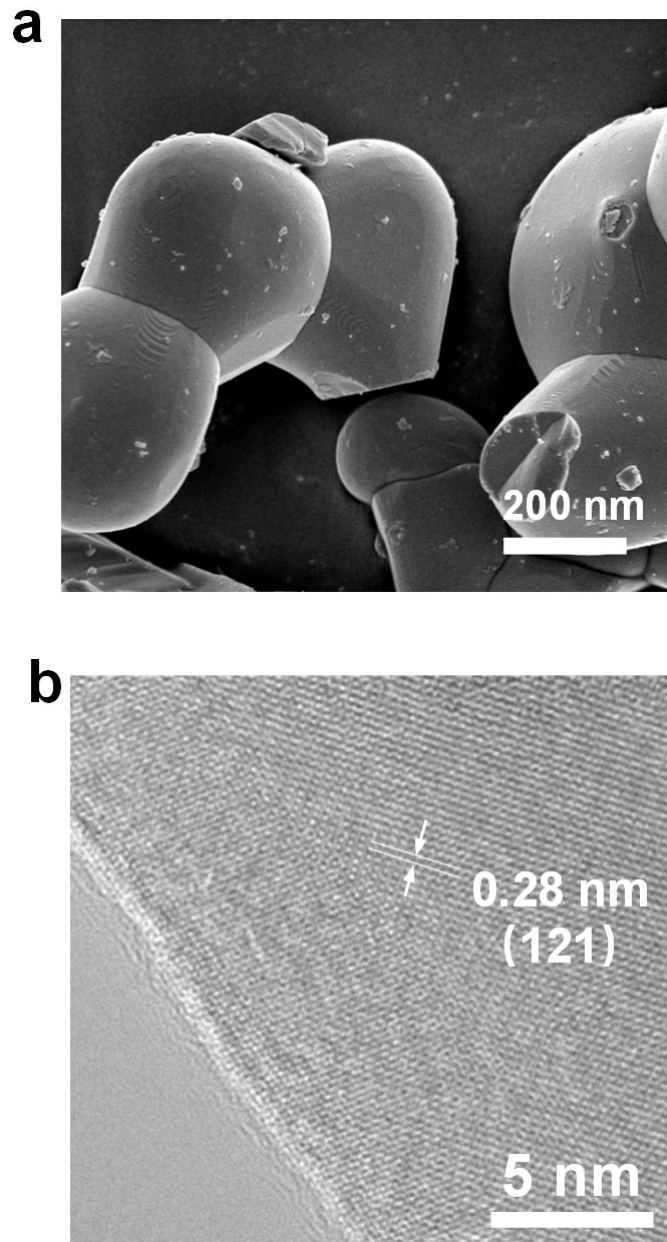

**Fig. S3** (a) SEM image and (b) HRTEM image of  $\text{YFe}_{0.6}\text{Mn}_{0.4}\text{O}_3$ .

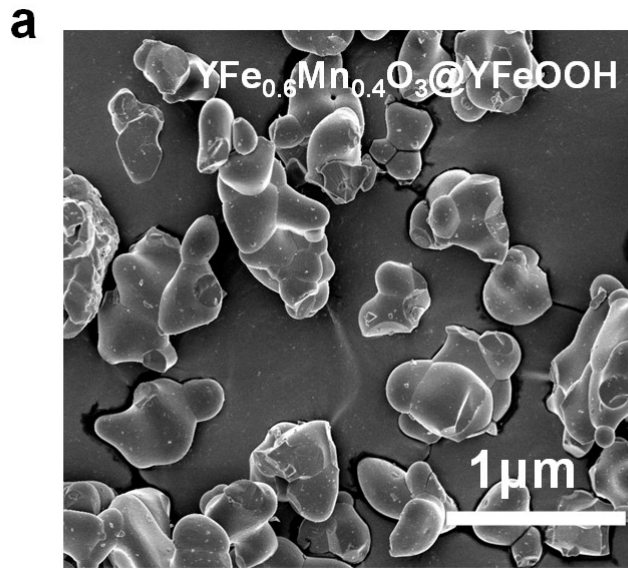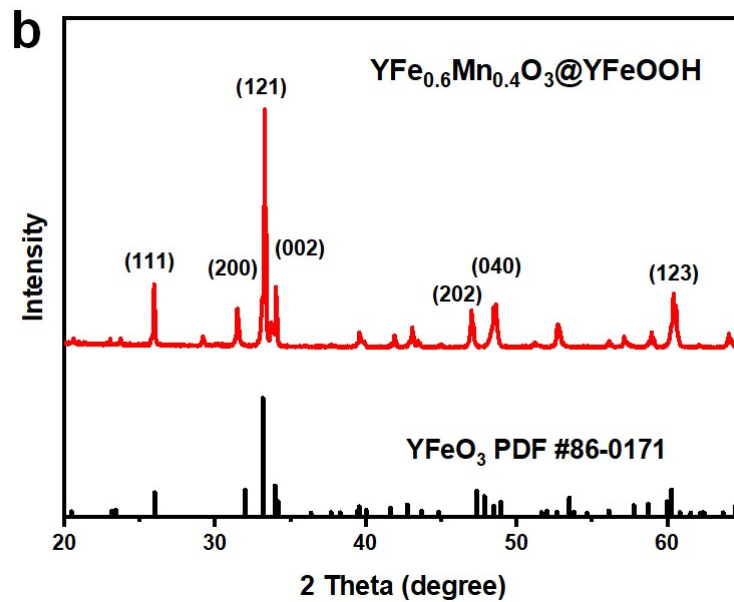

**Fig. S4** (a) SEM image image of YFe<sub>0.6</sub>Mn<sub>0.4</sub>O<sub>3</sub>@YFeOOH. (b) XRD pattern of YFe<sub>0.6</sub>Mn<sub>0.4</sub>O<sub>3</sub>@YFeOOH.

After the electrochemical activation of YFe<sub>0.6</sub>Mn<sub>0.4</sub>O<sub>3</sub> at an OER potential of 1.6 V for 20 minutes in a 1 M KOH electrolyte under 90°C, YFe<sub>0.6</sub>Mn<sub>0.4</sub>O<sub>3</sub>@YFeOOH maintains a similar morphology and structure to the original YFe<sub>0.6</sub>Mn<sub>0.4</sub>O<sub>3</sub>. XRD (X-ray diffraction) analysis still shows the same characteristic peaks

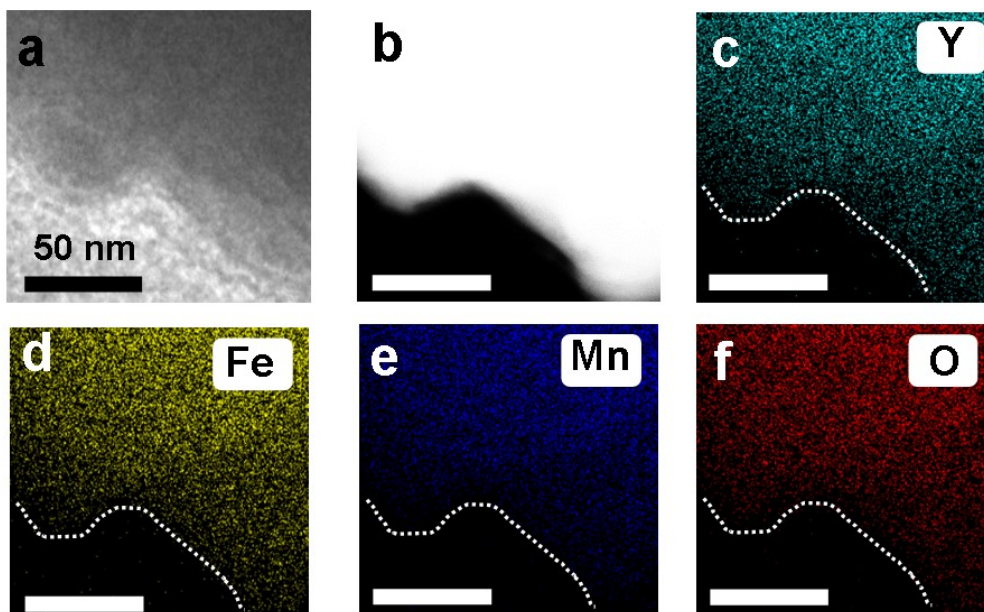

**Fig. S5** HAADF-STEM image of the YFe<sub>0.6</sub>Mn<sub>0.4</sub>O<sub>3</sub>@YFeOOH particle (a, b), and the Y (c), Fe (d), Mn (e), and O (f) distributions in YFe<sub>0.6</sub>Mn<sub>0.4</sub>O<sub>3</sub>@YFeOOH particle.

The compositions of the YFe<sub>0.6</sub>Mn<sub>0.4</sub>O<sub>3</sub> after electrochemical activation were further determined by the high angle annular dark field scanning transmission electron microscopy (HAADF-STEM) image and elemental mapping. Obviously, the amorphous layer comprises of uniformly dispersed Y, Fe, and O elements, but Mn element nearly misses in this layer.

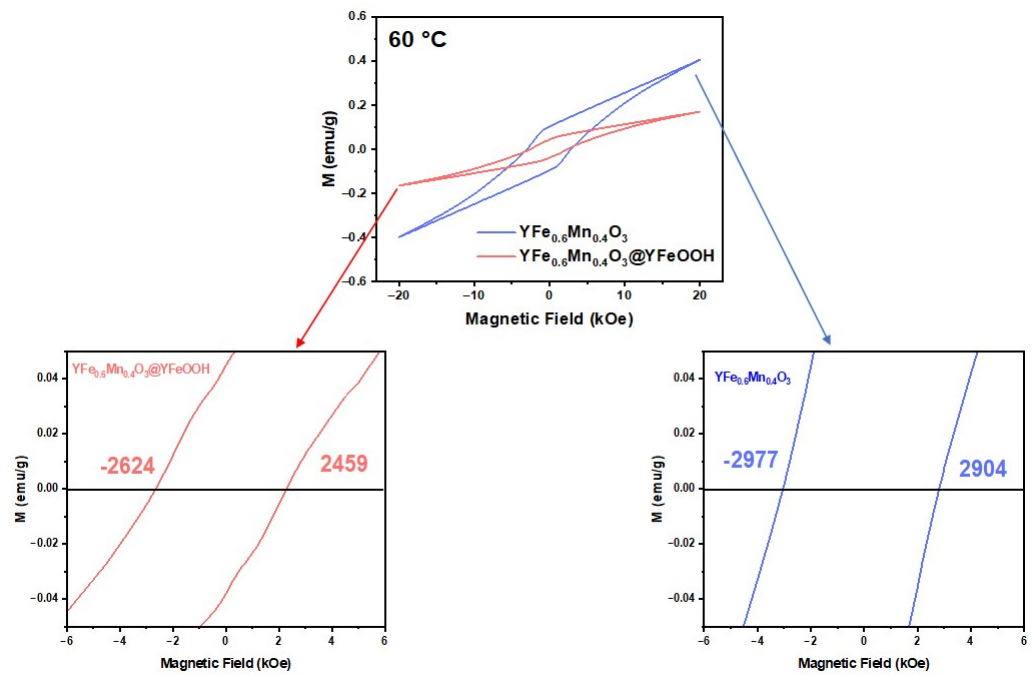

Fig. S6 Magnetic hysteresis loops for  $\text{YFe}_{0.6}\text{Mn}_{0.4}\text{O}_3$  and  $\text{YFe}_{0.6}\text{Mn}_{0.4}\text{O}_3@\text{YFeOOH}$  at 60 °C.

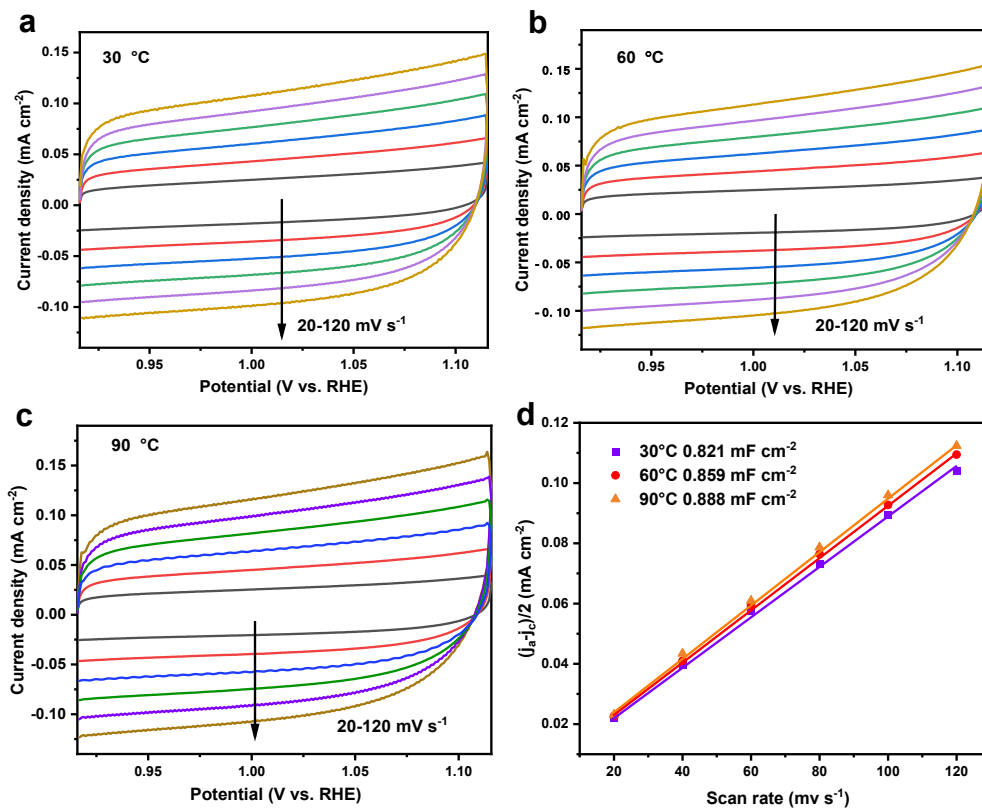

**Fig. S7** (a-c) CV curves of YFe<sub>0.6</sub>Mn<sub>0.4</sub>O<sub>3</sub>@YFeOOH with different scan rates in non-faradic region under (a) 30 °C, (b) 60 °C, (c) 90 °C. (d) The non-faraday current density at 1.0 V as a function of scan rates of YFe<sub>0.6</sub>Mn<sub>0.4</sub>O<sub>3</sub>@YFeOOH. The slope of fitting line is the double-layer capacitance.

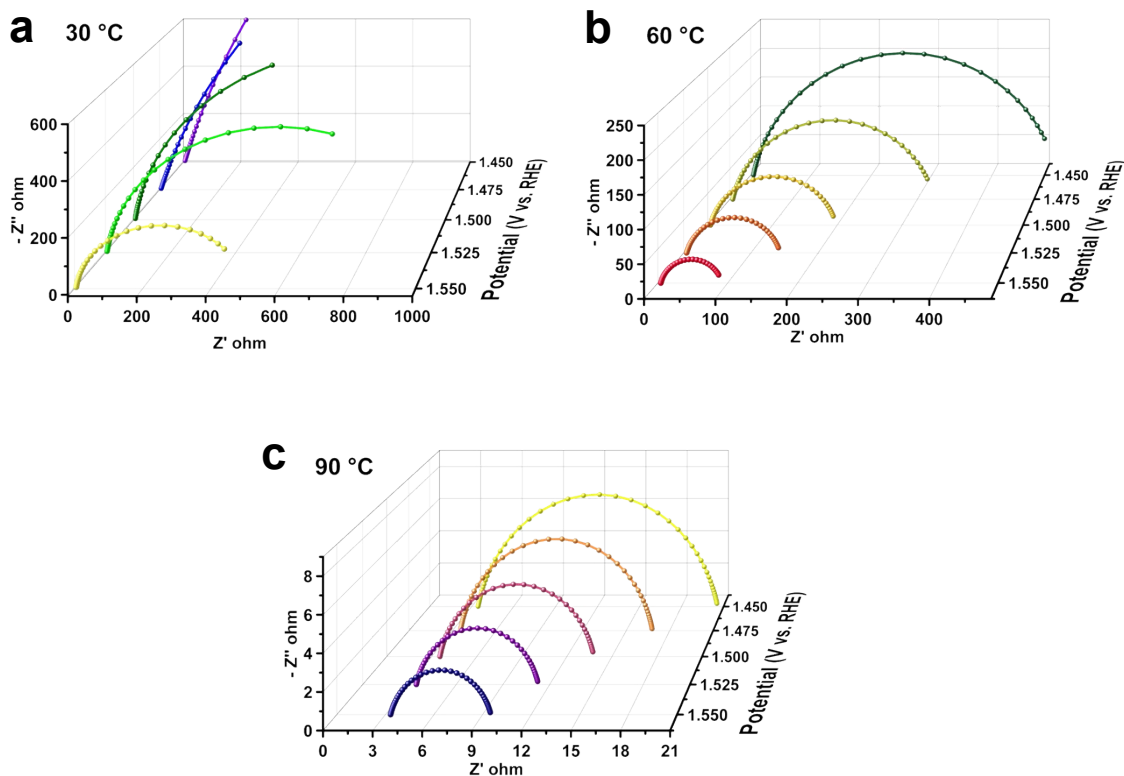



**Fig. S8** Temperature-dependent EIS spectra for  $\text{YFe}_{0.6}\text{Mn}_{0.4}\text{O}_3@Y\text{FeOOH}$  at. (a) 30 °C, (b) 60 °C, (c) 90 °C in the potential ranges of 1.450 ~ 1.550 V vs RHE.

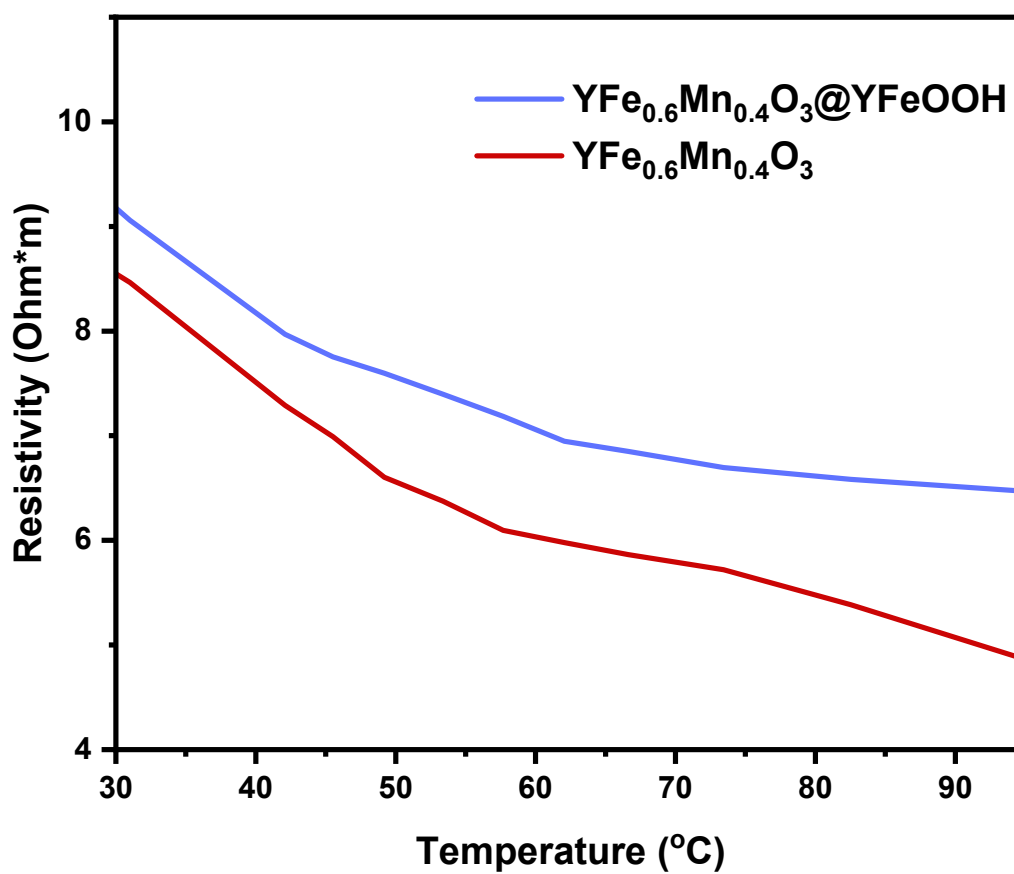

**Fig. S9** Temperature-dependent resistivity of  $\text{YFe}_{0.6}\text{Mn}_{0.4}\text{O}_3$  and  $\text{YFe}_{0.6}\text{Mn}_{0.4}\text{O}_3@Y\text{FeOOH}$ .

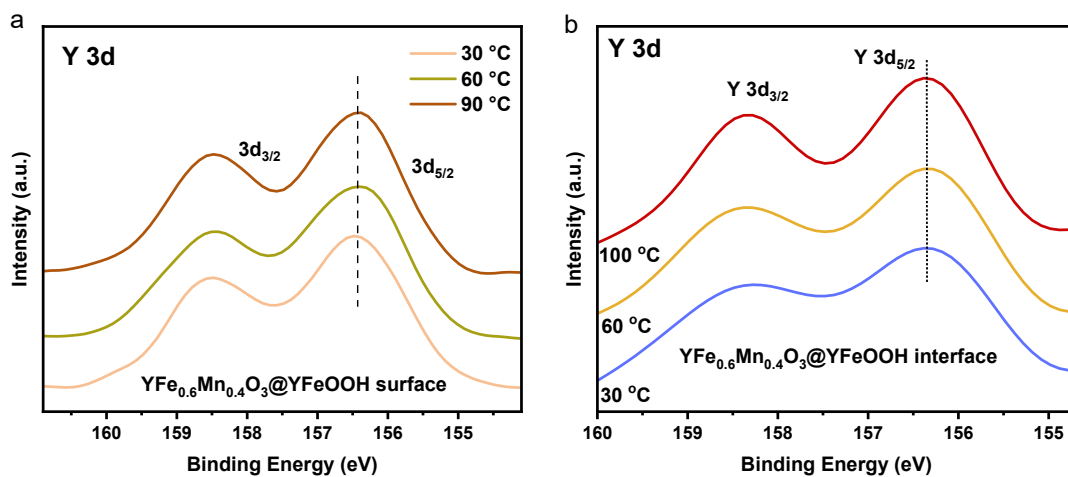

**Fig. S10** (a) Y 3d XPS spectra for  $\text{YFe}_{0.6}\text{Mn}_{0.4}\text{O}_3@Y\text{FeOOH}$  at different temperatures. (b) Y 3d XPS spectra for  $\text{YFe}_{0.6}\text{Mn}_{0.4}\text{O}_3@Y\text{FeOOH}$  at different temperatures after 6 nm etching.

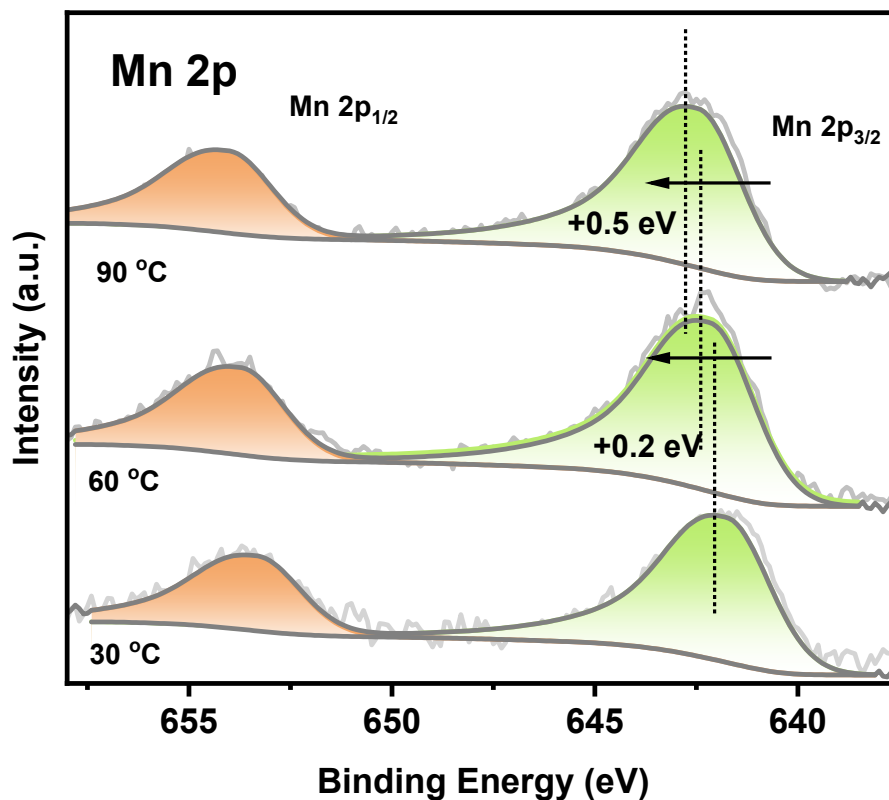

**Fig. S11** Mn 2p XPS spectra for YFe<sub>0.6</sub>Mn<sub>0.4</sub>O<sub>3</sub>@YFeOOH at different temperatures after 6 nm etching.

Fe 2p, Y 3d, and Mn 2p XPS (X-ray photoelectron spectroscopy) spectra were conducted on YFe<sub>0.6</sub>Mn<sub>0.4</sub>O<sub>3</sub>@YFeOOH at various temperatures following a 6 nm etching process. It was observed that at the interface between YFe<sub>0.6</sub>Mn<sub>0.4</sub>O<sub>3</sub> and YFeOOH, the binding energy shifts of both Fe and Mn exhibit temperature dependence, while the binding energy of Y remains largely unaffected by temperature changes. Compared to the in situ Fe2p XPS data at the surface of YFe<sub>0.6</sub>Mn<sub>0.4</sub>O<sub>3</sub>@YFeOOH, the binding energy shift of Fe2p at the interface after 6 nm etching is more significantly influenced by temperature. This indicates that the strong interfacial interactions, possibly induced by thermal-simulated magnetic disordering, cause the Fe2p binding energy to shift towards higher values.

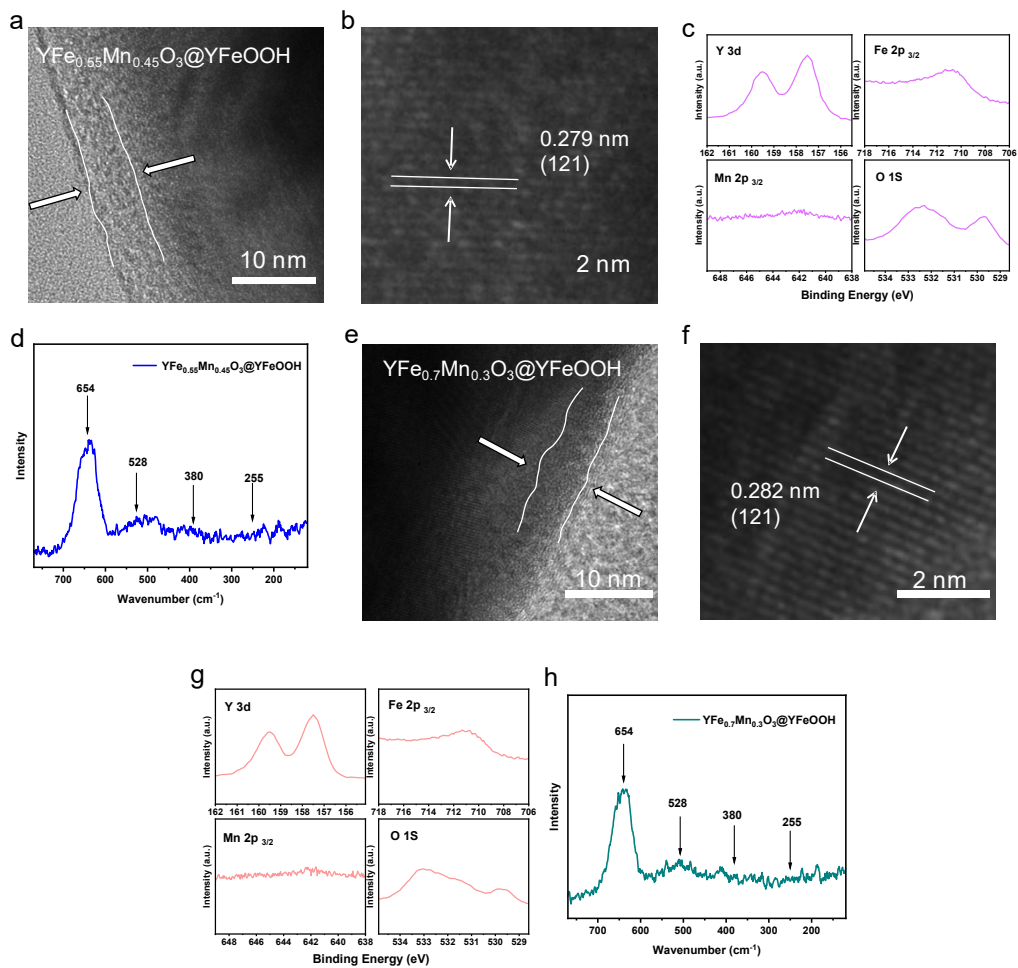

**Fig. S12** (a) HRTEM image, (b) High-resolution lattice image, (c) Y 3d, Fe 2p, Mn 2p, O 1s XPS spectra, (d) Raman spectrum for  $\text{YFe}_{0.55}\text{Mn}_{0.45}\text{O}_3$  after OER. (e) HRTEM image, (f) High-resolution lattice image, (g) Y 3d, Fe 2p, Mn 2p, O 1s XPS spectra, (h) Raman spectrum  $\text{YFe}_{0.7}\text{Mn}_{0.3}\text{O}_3$  after OER.

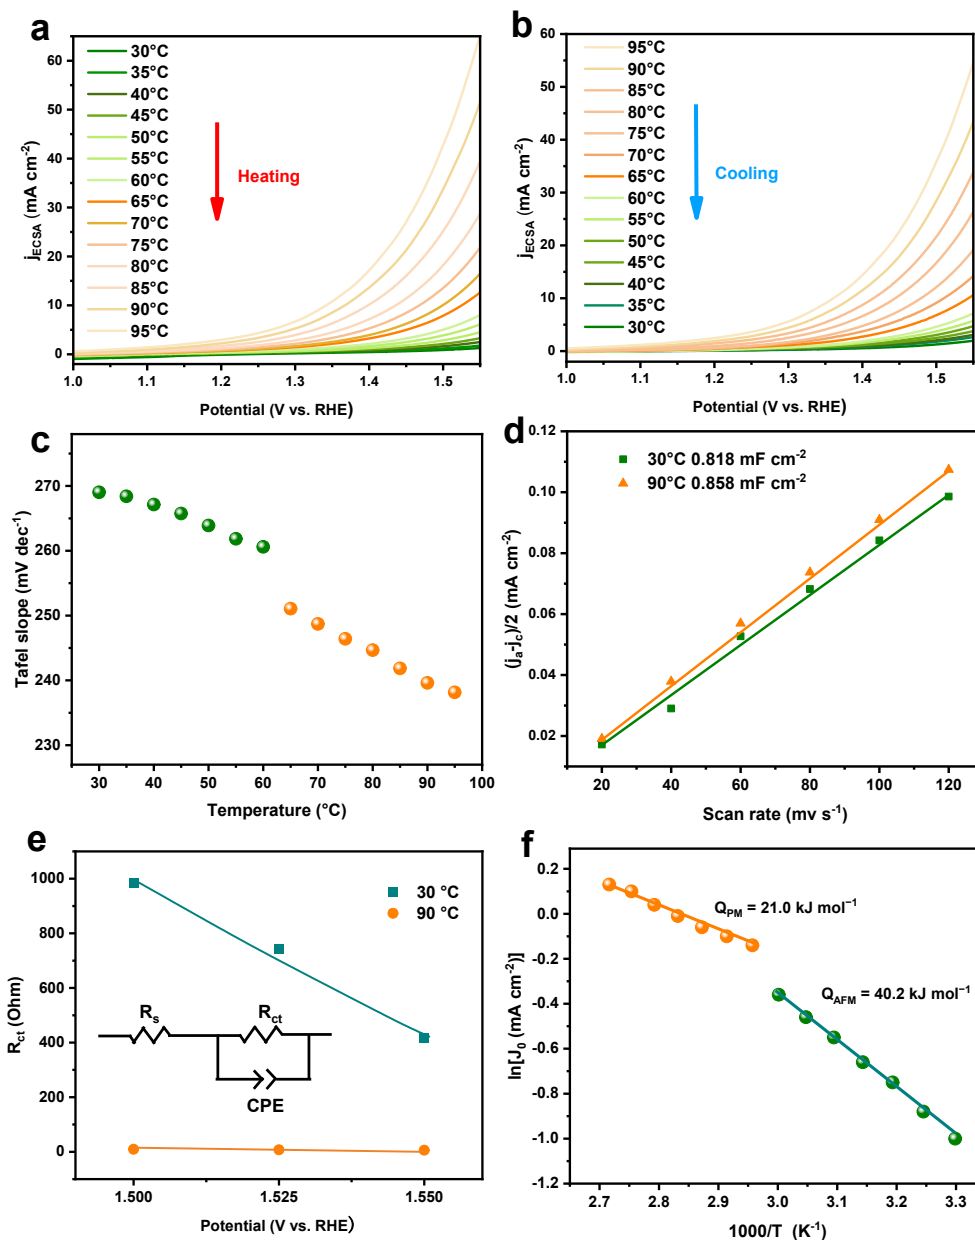

**Fig. S13** Heat-electricity coupling for accelerating the OER kinetics of  $\text{YFe}_{0.55}\text{Mn}_{0.45}\text{O}_3@Y\text{FeOOH}$  from 30 to 95 °C. (a) LSV curves normalized with ECSA for  $\text{YFe}_{0.55}\text{Mn}_{0.45}\text{O}_3@Y\text{FeOOH}$  with 95% iR correction in 1.0 M KOH during heating. (b) LSV curves normalized with ECSA for  $\text{YFe}_{0.55}\text{Mn}_{0.45}\text{O}_3@Y\text{FeOOH}$  with 95% iR correction in 1.0 M KOH during cooling. (c) Temperature-dependent Tafel slopes. (d) The non-faraday current density at 1.10 V as a function of scan rates of  $\text{YFe}_{0.55}\text{Mn}_{0.45}\text{O}_3@Y\text{FeOOH}$ . The slope of fitting line is the double-layer capacitance (e) Temperature-dependent  $R_{\text{ct}}$  fitted from EIS data in the potential regions of water oxidation. Inset shows the Randle's equivalent circuit. (f) Calculated  $\ln j_0 \cdot T^{-1}$  plot with nonlinear Arrhenius relationship for OER on  $\text{YFe}_{0.55}\text{Mn}_{0.45}\text{O}_3@Y\text{FeOOH}$ .

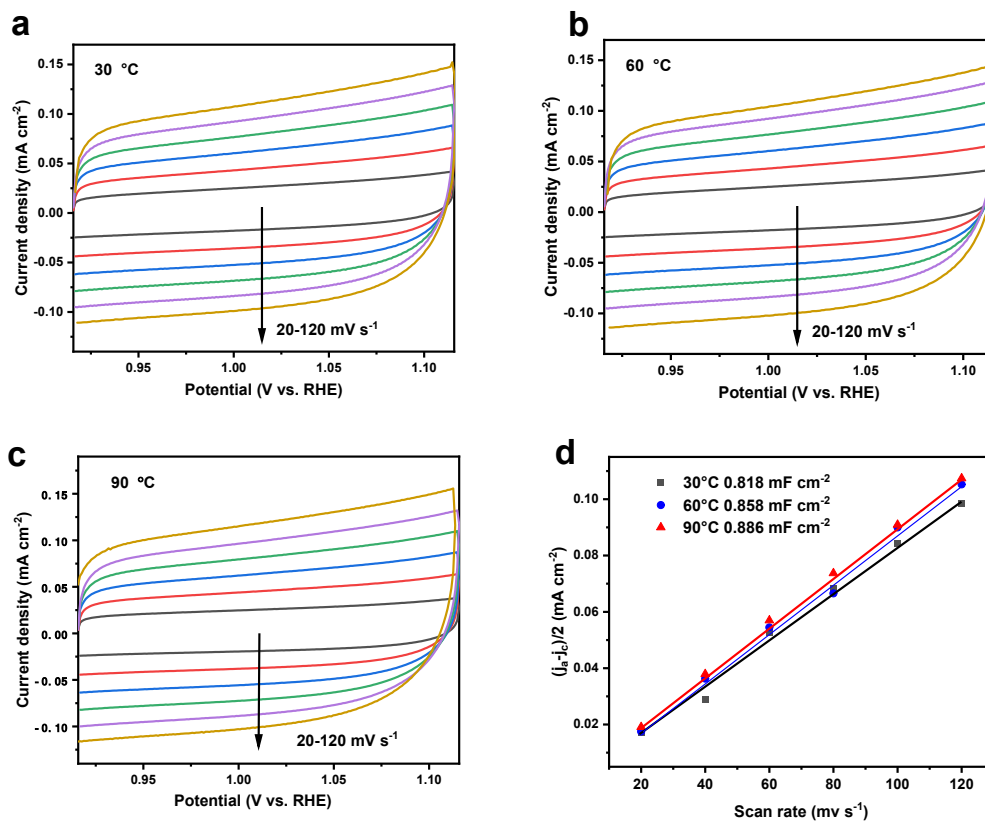

**Fig. S14** (a-c) CV curves of YFe<sub>0.55</sub>Mn<sub>0.45</sub>O<sub>3</sub>@YFeOOH with different scan rates in non-faradic region under (a) 30 °C, (b) 60 °C, (c) 90 °C. (d) The non-faraday current density at 1.0 V as a function of scan rates of YFe<sub>0.55</sub>Mn<sub>0.45</sub>O<sub>3</sub>@YFeOOH. The slope of fitting line is the double-layer capacitance.

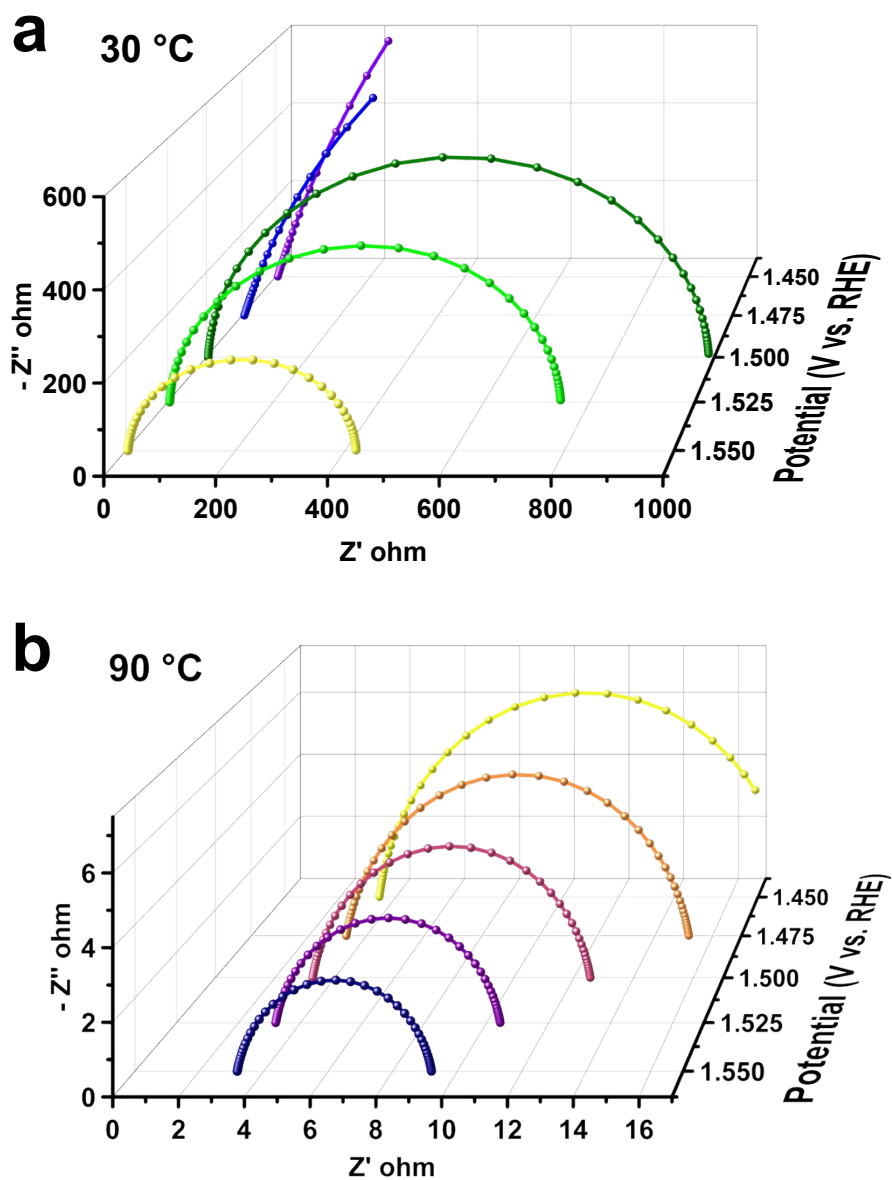

**Fig. S15** Temperature-dependent Nyquist plots for  $\text{YFe}_{0.55}\text{Mn}_{0.45}\text{O}_3@Y\text{FeOOH}$  at (a) 30 °C, and (b) 90 °C in the potential range of 1.450~1.550 V vs RHE.

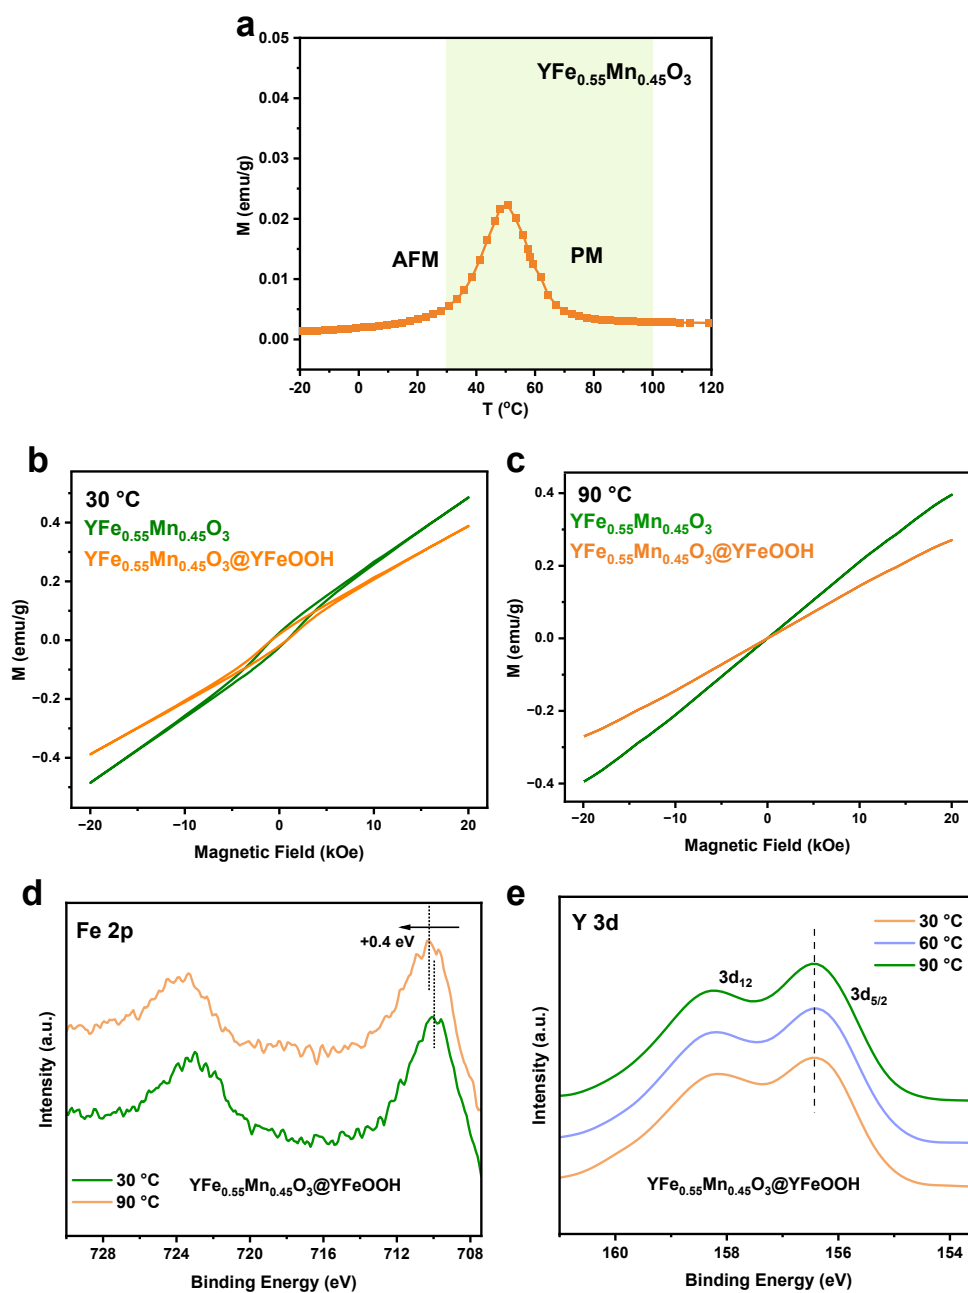

**Fig. S16** The influence of temperature on the magnetic properties of YFe<sub>0.55</sub>Mn<sub>0.45</sub>O<sub>3</sub> and elemental valence states of YFe<sub>0.55</sub>Mn<sub>0.45</sub>O<sub>3</sub>@YFeOOH. (a) Field cooled magnetization curves for YFe<sub>0.55</sub>Mn<sub>0.45</sub>O<sub>3</sub> at an applied field of 100 Oe. (b, c) Magnetic hysteresis loops for YFe<sub>0.55</sub>Mn<sub>0.45</sub>O<sub>3</sub> and YFe<sub>0.55</sub>Mn<sub>0.45</sub>O<sub>3</sub>@YFeOOH at 30 °C and 90 °C. (d) Fe 2p and Y 3d XPS spectra for YFe<sub>0.55</sub>Mn<sub>0.45</sub>O<sub>3</sub>@YFeOOH at different temperatures.



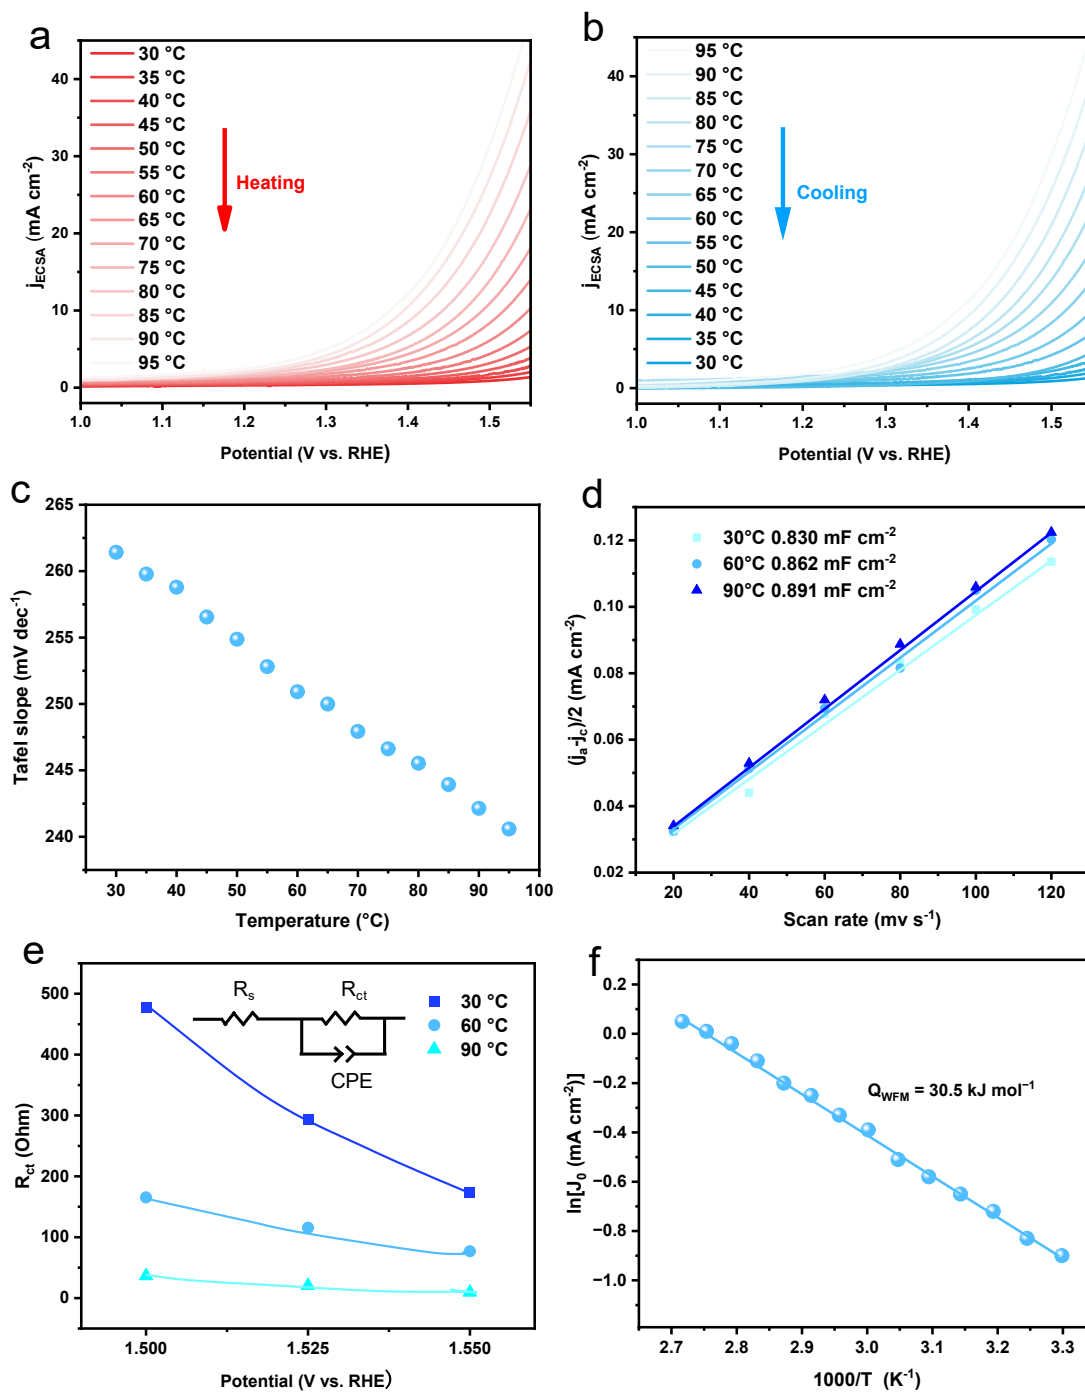

**Fig. S17 Heat-electricity coupling for accelerating the OER kinetics of  $\text{YFe}_{0.7}\text{Mn}_{0.3}\text{O}_3@Y\text{FeOOH}$  from 30 to 95 °C.** (a) LSV curves normalized with ECSA for  $\text{YFe}_{0.7}\text{Mn}_{0.3}\text{O}_3@Y\text{FeOOH}$  with 95% iR correction in 1.0 M KOH during heating. (b) LSV curves normalized with ECSA for  $\text{YFe}_{0.7}\text{Mn}_{0.3}\text{O}_3@Y\text{FeOOH}$  with 95% iR correction in 1.0 M KOH during cooling. (c) Temperature-dependent Tafel slopes. (d) The non-faraday current density at 1.10 V as a function of scan rates of  $\text{YFe}_{0.7}\text{Mn}_{0.3}\text{O}_3@Y\text{FeOOH}$ . The slope of fitting line is the double-layer capacitance (e) Temperature-dependent  $R_{\text{ct}}$  fitted from EIS data in the potential regions of water oxidation. Inset shows the Randle's equivalent circuit. (f) Calculated  $\ln|j_0| \cdot T^{-1}$  plot with linear Arrhenius relationship for OER on  $\text{YFe}_{0.7}\text{Mn}_{0.3}\text{O}_3@Y\text{FeOOH}$ .

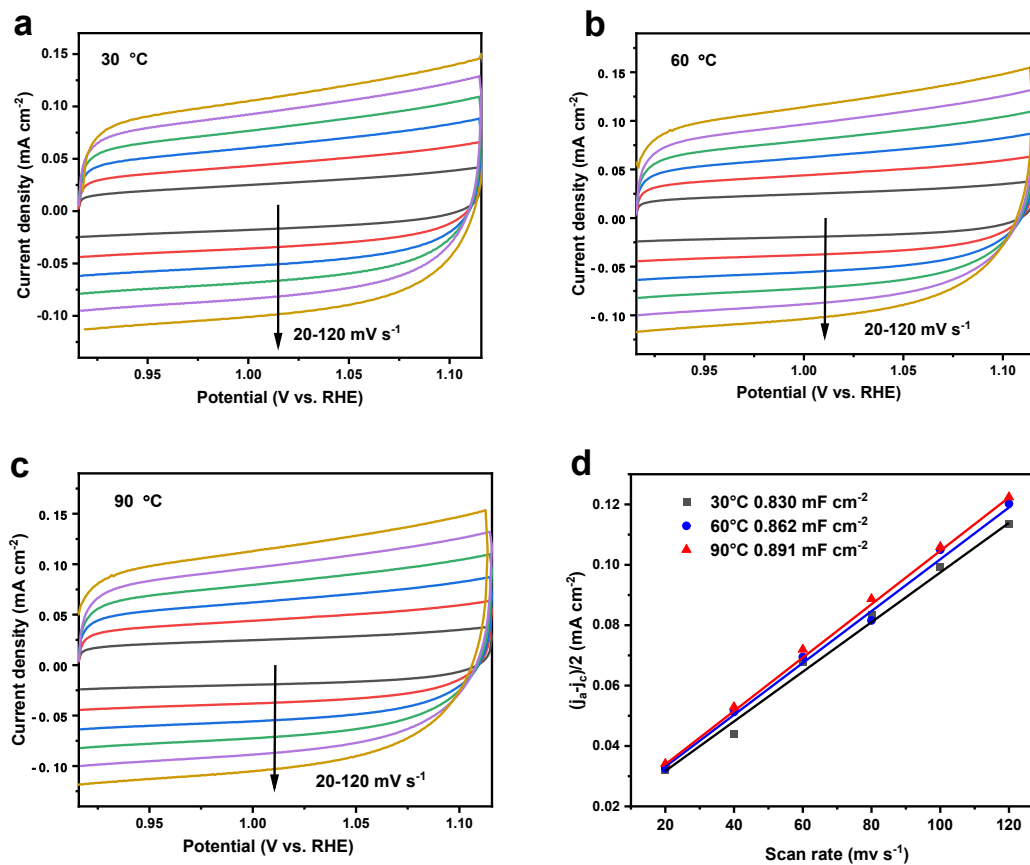

**Fig. S18** (a-c) CV curves of YFe<sub>0.7</sub>Mn<sub>0.3</sub>O<sub>3</sub>@YFeOOH with different scan rates in non-faradic region under (a) 30 °C, (b) 60 °C, (c) 90 °C. (d) The non-faraday current density at 1.0 V as a function of scan rates of YFe<sub>0.7</sub>Mn<sub>0.3</sub>O<sub>3</sub>@YFeOOH. The slope of fitting line is the double-layer capacitance.

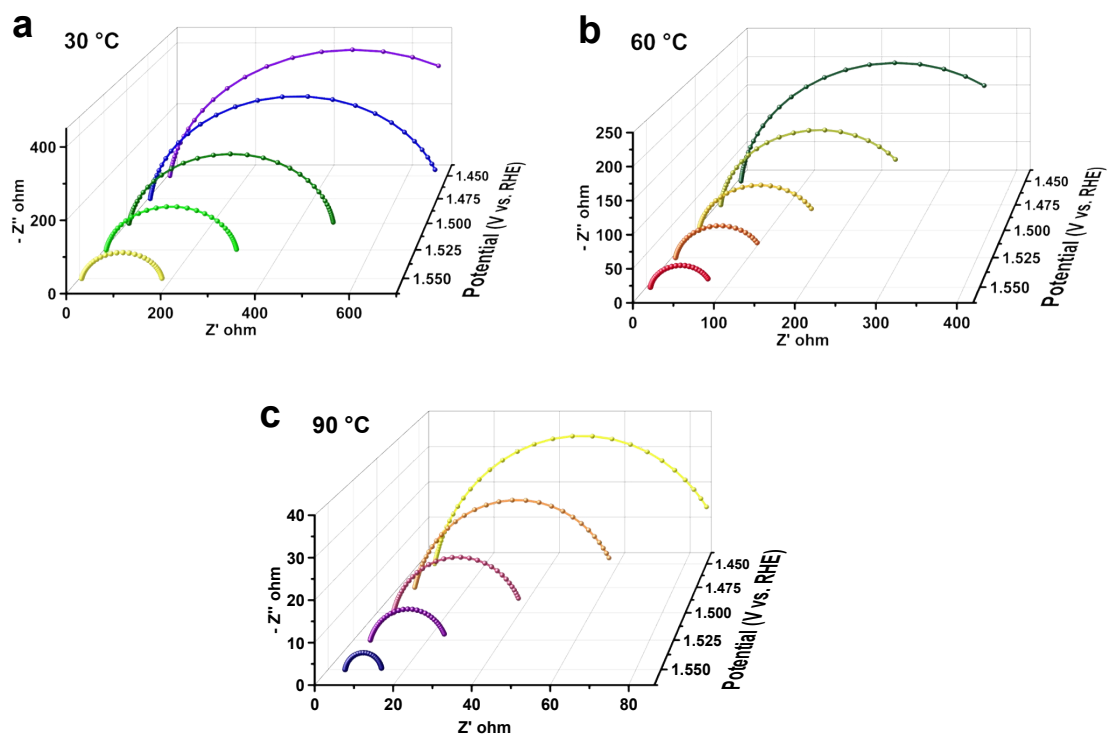

**Fig. S19** Temperature-dependent Nyquist plots for  $\text{YFe}_{0.7}\text{Mn}_{0.3}\text{O}_3@Y\text{FeOOH}$  at (a) 30 °C, (b) 60 °C, and (c) 90 °C in the potential ranges of 1.450–1.550 V vs RHE.

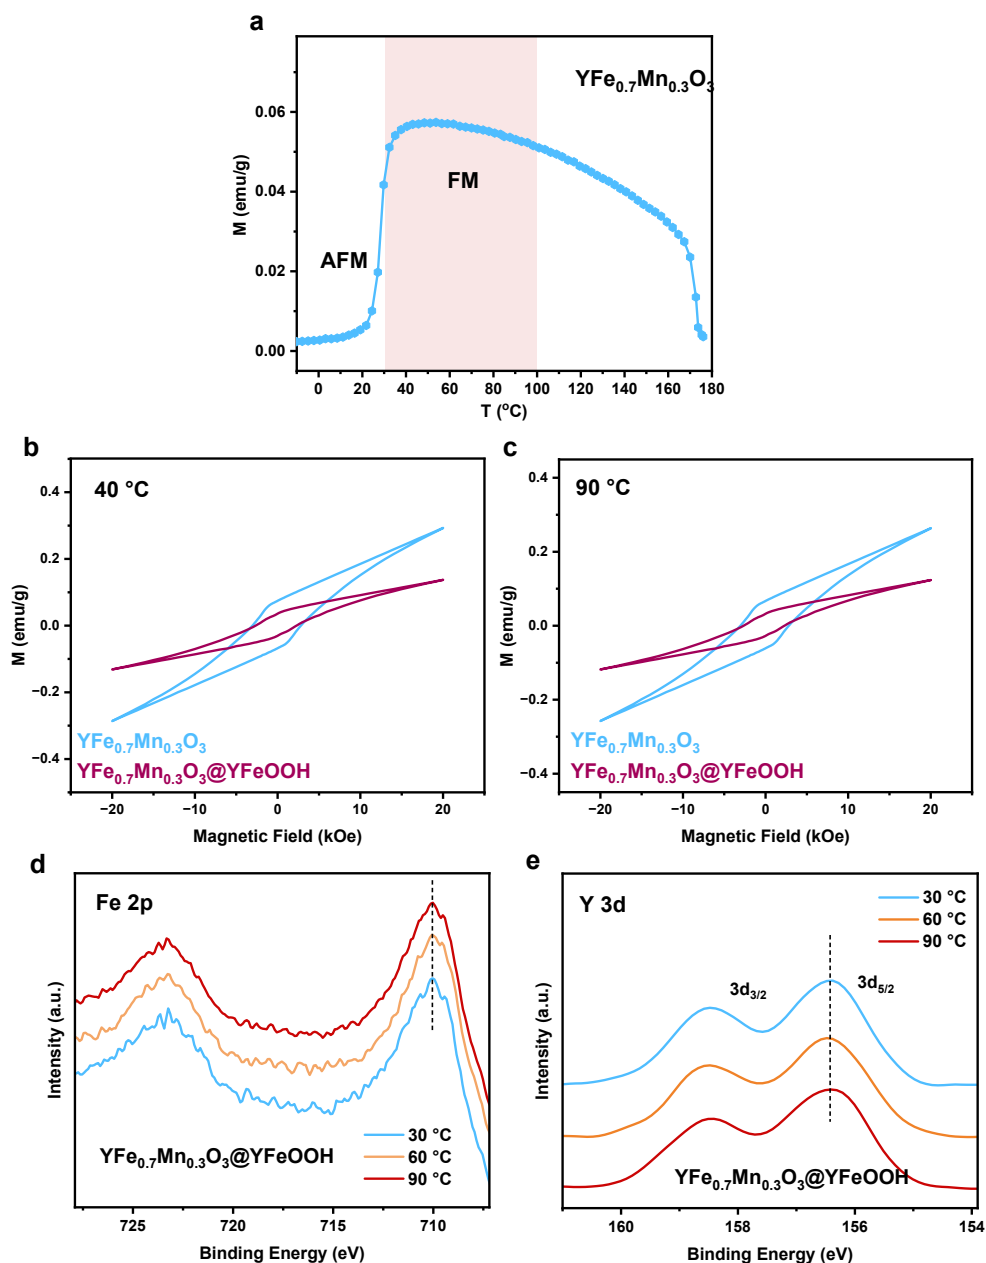

**Fig. S20** The thermal magnetic properties of  $\text{YFe}_{0.7}\text{Mn}_{0.3}\text{O}_3$  and  $\text{YFe}_{0.7}\text{Mn}_{0.3}\text{O}_3@Y\text{FeOOH}$  and elemental valence states of  $\text{YFe}_{0.7}\text{Mn}_{0.3}\text{O}_3@Y\text{FeOOH}$  under thermal stimulation. (a) Field cooled magnetization curves for  $\text{YFe}_{0.7}\text{Mn}_{0.3}\text{O}_3$  at an applied field of 100 Oe. (b, c) Magnetic hysteresis loops for  $\text{YFe}_{0.7}\text{Mn}_{0.3}\text{O}_3$  and  $\text{YFe}_{0.7}\text{Mn}_{0.3}\text{O}_3@Y\text{FeOOH}$  at 60 °C. (d, e) Fe 2p and Y 3d XPS spectra for  $\text{YFe}_{0.7}\text{Mn}_{0.3}\text{O}_3@Y\text{FeOOH}$  at different temperatures.

In 30-100 °C, the  $\text{YFe}_{0.7}\text{Mn}_{0.3}\text{O}_3$  maintain canted antiferromagnetic state.

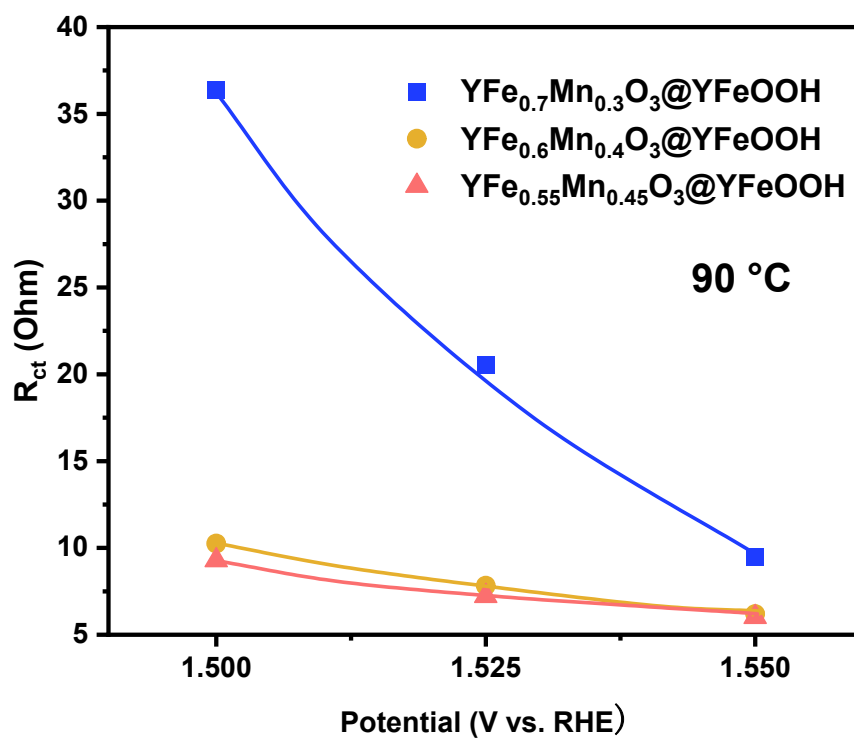

**Fig. S21** Temperature-dependent  $R_{ct}$  fitted from EIS data in the OER potential regions of  $\text{YFe}_{0.7}\text{Mn}_{0.3}\text{O}_3@\text{YFeOOH}$ ,  $\text{YFe}_{0.6}\text{Mn}_{0.4}\text{O}_3@\text{YFeOOH}$  and  $\text{YFe}_{0.55}\text{Mn}_{0.45}\text{O}_3@\text{YFeOOH}$  at 90 °C.

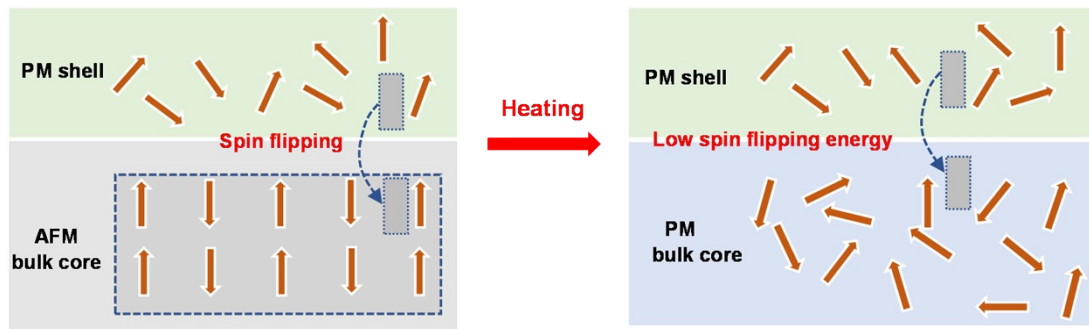

**Fig. S22** The temperature-dependent spin-related electron transfer at the interface between  $\text{YFe}_{0.55}\text{Mn}_{0.45}\text{O}_3$  core and  $\text{YFeOOH}$  shell.

**Table S1.** The element content of Fe and Mn determined by inductively coupled plasma optical emission spectrometer (ICP-OES).

| Samples                                     | Element content<br>(mg/kg) |          | Molar content<br>(%) |      |
|---------------------------------------------|----------------------------|----------|----------------------|------|
|                                             | Fe                         | Mn       | Fe                   | Mn   |
| $\text{YFe}_{0.7}\text{Mn}_{0.3}\text{O}_3$ | 56375.21                   | 24913.26 | 68.8                 | 31.2 |
| $\text{YFe}_{0.6}\text{Mn}_{0.4}\text{O}_3$ | 59703.70                   | 39611.11 | 59.5                 | 40.5 |
| $\text{YFe}_{0.55}\text{Mn}_{0.45}\text{O}$ | 55874.24                   | 47243.25 | 55.2                 | 44.8 |

3

**Table S2.** The molar amount for Y and Fe in the surface layer of  $\text{YFe}_{1-x}\text{Mn}_x\text{O}_3$  ( $x = 0.3, 0.4,$  and  $0.45$ ) after activation. The data were obtained by XPS analysis.

| Samples | Element content (At. %) |       |
|---------|-------------------------|-------|
|         | Y 3d                    | Fe 2p |

|                                                             |      |      |
|-------------------------------------------------------------|------|------|
| $\text{YFe}_{0.7}\text{Mn}_{0.3}\text{O}_3@\text{YFeOOH}$   | 19.2 | 19   |
| $\text{YFe}_{0.6}\text{Mn}_{0.4}\text{O}_3@\text{YFeOOH}$   | 19   | 18.6 |
| $\text{YFe}_{0.55}\text{Mn}_{0.45}\text{O}_3@\text{YFeOOH}$ | 19.3 | 18.7 |

**Table S3.** Elemental ratio of Y and Fe at different etching depths of  $\text{YFe}_{0.6}\text{Mn}_{0.4}\text{O}_3@\text{YFeOOH}$ .



| Etching depth (nm) | Y/Fe ratio |
|--------------------|------------|
| 0                  | 1 : 1      |
| 2                  | 1.08 : 1   |
| 4                  | 1.12 : 1   |
| 6                  | 1.19 : 1   |
| 10                 | 1.63 : 1   |
| 20                 | 1.71 : 1   |

**Table S4.** The effects of temperature on reference electrode potential and pH in 1.0 M KOH.

| Temperature (°C) | $\Delta E_{\text{Hg/HgO}}$ (V) | <sup>a</sup> $E_{\text{RHE}}$ (V) | <sup>b</sup> $E^{\circ}_{\text{H}_2\text{O}}$ (V) |
|------------------|--------------------------------|-----------------------------------|---------------------------------------------------|
| 30               | 0.9158                         | $E_{\text{Hg/HgO}} + 0.9158$      | 1.2245                                            |
| 35               | 0.9142                         | $E_{\text{Hg/HgO}} + 0.9142$      | 1.2200                                            |
| 40               | 0.9126                         | $E_{\text{Hg/HgO}} + 0.9126$      | 1.2155                                            |
| 45               | 0.9106                         | $E_{\text{Hg/HgO}} + 0.9106$      | 1.2110                                            |
| 50               | 0.9078                         | $E_{\text{Hg/HgO}} + 0.9078$      | 1.2065                                            |
| 55               | 0.9060                         | $E_{\text{Hg/HgO}} + 0.9060$      | 1.2020                                            |
| 60               | 0.9040                         | $E_{\text{Hg/HgO}} + 0.9040$      | 1.1975                                            |
| 65               | 0.9015                         | $E_{\text{Hg/HgO}} + 0.9015$      | 1.1930                                            |
| 70               | 0.8988                         | $E_{\text{Hg/HgO}} + 0.8988$      | 1.1885                                            |
| 75               | 0.8957                         | $E_{\text{Hg/HgO}} + 0.8957$      | 1.1840                                            |
| 80               | 0.8929                         | $E_{\text{Hg/HgO}} + 0.8929$      | 1.1795                                            |
| 85               | 0.8890                         | $E_{\text{Hg/HgO}} + 0.8890$      | 1.1750                                            |
| 90               | 0.8850                         | $E_{\text{Hg/HgO}} + 0.8850$      | 1.1705                                            |
| 95               | 0.8810                         | $E_{\text{Hg/HgO}} + 0.8810$      | 1.1660                                            |
| 100              | 0.8770                         | $E_{\text{Hg/HgO}} + 0.8770$      | 1.1620                                            |

<sup>a</sup> According to the Nernst equation of  $E_{\text{RHE}} = E_{\text{ref}} + (2.303RT/nF)\text{pH} + E^{\circ}_{\text{ref}}$ , we could know that the reversible hydrogen potential (RHE) is related with temperature. Thus, the effect of temperature on the Hg/HgO reference electrode potential was corrected by a potential corrective term of  $\Delta E_{\text{Hg/HgO}}$ , which was tested by the open circuit voltage in two electrode system comprising of a Hg/HgO electrode and a standard hydrogen electrode.

<sup>b</sup> The temperature-dependent theoretical thermodynamic water splitting potential ( $E^{\circ}_{\text{H}_2\text{O}}$ ) is calculated by an empirical equation of  $E^{\circ}_{\text{H}_2\text{O}} = 1.229 - 0.9 \times 10^{-3} (T - 298)^4$ .

**Table S5.** Fitting parameters of EIS data for  $\text{YFe}_{0.6}\text{Mn}_{0.4}\text{O}_3@\text{YFeOOH}$  using the equivalent circuit proposed in the inset in Fig. 4d.

| Temperature<br>(°C) | Potential<br>(V vs RHE) | $R_s$<br>( $\Omega$ ) | CPE-T            | CPE-p          | $R_{ct}$<br>( $\Omega$ ) | $C_{ct}$<br>( $\mu\text{F}$ ) |
|---------------------|-------------------------|-----------------------|------------------|----------------|--------------------------|-------------------------------|
| <b>30</b>           | 1.450                   | 5.5394                | 0.0004482        | 0.84588        | 6017                     | 2.8540                        |
|                     | 1.475                   | 5.536                 | 0.0006605        | 0.83524        | 389                      | 3.9191                        |
|                     | <b>1.500</b>            | <b>5.53</b>           | <b>0.0009886</b> | <b>0.92214</b> | <b>1499</b>              | <b>33.784</b>                 |
|                     | 1.525                   | 5.504                 | 0.00101          | 0.92075        | 1050                     | 33.869                        |
|                     | 1.550                   | 5.486                 | 0.00102          | 0.92283        | 495.                     | 35.302                        |
| <b>60</b>           | 1.450                   | 4.519                 | 0.0008023        | 0.88995        | 502.                     | 14.856                        |
|                     | <b>1.475</b>            | <b>4.508</b>          | <b>0.00141</b>   | <b>0.90427</b> | <b>322.</b>              | <b>38.341</b>                 |
|                     | 1.500                   | 4.499                 | 0.0016           | 0.89923        | 193.                     | 41.244                        |
|                     | 1.525                   | 4.47                  | 0.00172          | 0.90184        | 139                      | 46.749                        |
|                     | 1.550                   | 4.396                 | 0.00173          | 0.91011        | 87.3                     | 53.287                        |
| <b>90</b>           | 1.450                   | 3.559                 | 0.00229          | 0.86069        | 17.11                    | 53.118                        |
|                     | 1.475                   | 3.557                 | 0.00366          | 0.86598        | 13.25                    | 66.223                        |
|                     | 1.500                   | 3.549                 | 0.00403          | 0.86919        | 10.2                     | 78.275                        |
|                     | 1.525                   | 3.445                 | 0.00438          | 0.87239        | 7.82                     | 90.451                        |
|                     | 1.550                   | 3.323                 | 0.00442          | 0.88808        | 6.18                     | 121                           |

**Table S6.** Fitting parameters of EIS data for  $\text{YFe}_{0.55}\text{Mn}_{0.45}\text{O}_3@\text{YFeOOH}$  using the equivalent circuit proposed in the inset in Supplementary Fig. 6e.

| Temperature<br>(°C) | Potential<br>(V vs RHE) | $R_s$<br>( $\Omega$ ) | CPE-T     | CPE-p   | $R_{ct}$<br>( $\Omega$ ) | $C_{ct}$<br>( $\mu\text{F}$ ) |
|---------------------|-------------------------|-----------------------|-----------|---------|--------------------------|-------------------------------|
| 30                  | 1.450                   | 4.699                 | 0.0001685 | 0.86103 | 5050                     | 1.0440                        |
|                     | 1.475                   | 4.693                 | 0.001755  | 0.87085 | 2790                     | 1.4029                        |
|                     | 1.500                   | 4.195                 | 0.00101   | 0.92456 | 985                      | 35.202                        |
|                     | 1.525                   | 4.146                 | 0.00103   | 0.92487 | 741.3                    | 36.23                         |
|                     | 1.550                   | 4.141                 | 0.00105   | 0.93212 | 415.9                    | 41.139                        |
| 90                  | 1.450                   | 3.41                  | 0.00364   | 0.87224 | 14.86                    | 72.308                        |
|                     | 1.475                   | 3.302                 | 0.00433   | 0.88303 | 11.88                    | 105                           |
|                     | 1.500                   | 3.265                 | 0.0046    | 0.88614 | 9.286                    | 118                           |
|                     | 1.525                   | 3.2                   | 0.00517   | 0.87694 | 7.233                    | 119                           |
|                     | 1.550                   | 3.179                 | 0.005     | 0.8789  | 6.021                    | 116                           |

**Table S7.** Fitting parameters of EIS data for  $\text{YFe}_{0.7}\text{Mn}_{0.3}\text{O}_3@\text{YFeOOH}$  using the equivalent circuit proposed in the inset in Supplementary Fig. 9e.

| Temperature<br>(°C) | Potential<br>(V vs RHE) | $R_s$<br>( $\Omega$ ) | CPE-T     | CPE-p   | $R_{ct}$<br>( $\Omega$ ) | $C_{ct}$<br>( $\mu\text{F}$ ) |
|---------------------|-------------------------|-----------------------|-----------|---------|--------------------------|-------------------------------|
| 30                  | 1.450                   | 5.573                 | 0.0009125 | 0.90125 | 939.6                    | 11.1                          |
|                     | 1.475                   | 5.57                  | 0.00122   | 0.91093 | 651.3                    | 36.401                        |
|                     | 1.500                   | 5.542                 | 0.00144   | 0.90456 | 477.1                    | 40.171                        |
|                     | 1.525                   | 5.38<br>4             | 0.00153   | 0.90027 | 293.1                    | 40.353                        |
|                     | 1.550                   | 5.30<br>9             | 0.00192   | 0.88226 | 173.9                    | 40.347                        |
| 60                  | 1.450                   | 5.20<br>8             | 0.0006803 | 0.92782 | 453.1                    | 23.774                        |
|                     | 1.475                   | 5.192                 | 0.00113   | 0.93991 | 278.7                    | 51.119                        |
|                     | 1.500                   | 5.179                 | 0.00141   | 0.92127 | 165.4                    | 50.303                        |
|                     | 1.525                   | 5.177                 | 0.00202   | 0.90527 | 115.5                    | 60.941                        |
|                     | 1.550                   | 5.174                 | 0.00221   | 0.89578 | 76.8                     | 58.844                        |
| 90                  | 1.450                   | 4.70<br>8             | 0.00388   | 0.85159 | 88.66                    | 61.539                        |
|                     | 1.475                   | 4.68                  | 0.00473   | 0.85023 | 59.56                    | 78.753                        |
|                     | 1.500                   | 4.64<br>4             | 0.00564   | 0.85724 | 36.37                    | 110                           |
|                     | 1.525                   | 4.58<br>5             | 0.0058    | 0.86277 | 20.51                    | 122                           |
|                     | 1.550                   | 4.04<br>9             | 0.00585   | 0.87061 | 9.5                      | 132                           |

#### Supplementary references

1. P. Mandal, C. Serrao, E. Suard, V. Caignaert, B. Raveau, A. Sundaresan and C. Rao, J.

- Solid State Chem.* 2013, **197**, 408-413.
2. S. Geller and E. Wood, *Acta Crystallogr.* 1956, **9**, 563-568.
  3. N. Cohen and O. Diéguez, *Phys. Rev. B* 2021, **104**, 064111.
  4. A. Awasthi, K. Scott and S. Basu, *Int. J. Hydrogen Energ.* 2011, **36**, 14779-14786.
